# Supplementary material for: Structural Adaptive, Self-Separating Material for Removing Ibuprofen from Waters and Sewage
Source: MDPI journal article supplement (doi:10.3390/ma14247697), 2021-12-13
Supplement: s1 [file s1]

# Structural Adaptive, Self-Separating Material for Removing Ibuprofen from Waters and Sewage

Anna Maria Skwierawska <sup>1,\*</sup>, Dominika Nowacka <sup>1</sup>, Paulina Nowicka <sup>1</sup> and Sandra Rosa <sup>1</sup> and Katarzyna Kozłowska-Tylingo <sup>2</sup>

<sup>1</sup> Department of Chemistry and Technology of Functional Materials, Gdansk University of Technology, Narutowicza 11/12, 80-233 Gdansk, Poland; dnowacka97@gmail.com (D.N.); paulina.nowicka1234@gmail.com (P.N.); sandrarosaaaa@gmail.com (S.R.)

<sup>2</sup> Department of Pharmaceutical Technology and Biochemistry, Gdansk University of Technology, Narutowicza 11/12, 80-233 Gdansk, Poland; katarzyna.kozlowska-tylingo@pg.edu.pl

\* Correspondence: anna.skwierawska@pg.edu.pl

**Table S1.** The reported concentrations of IBU (ng L<sup>-1</sup>) in waters.

| Country  | River       | Concentration | References |
|----------|-------------|---------------|------------|
| France   | NA          | 4.5           | [1]        |
| Greece   | Aisonas     | 17            | [2]        |
| Mexico   | –           | 1406          | [3]        |
| Portugal | Lima River  | 723           | [4]        |
| USA      | Mississippi | 34            | [5]        |

  

| Country                | Concentration in Raw Sewage | Concentration in Treated Sewage | Removal Efficiency [%] | References |
|------------------------|-----------------------------|---------------------------------|------------------------|------------|
| Poland (Hajdów Lublin) | 649                         | 412                             | 37                     | [6]        |
| Poland (Gdańsk)        | 1664                        | 679                             | 59                     | [6]        |
| Poland (Szczecin)      | 894                         | 516                             | 42                     | [6]        |
| USA (Maryland)         | 9500–14700                  | 10–20                           | 99                     | [7]        |
| Switzerland            | 2000–3000                   | 600–800                         | 53–79                  | [7]        |
| United Kingdom         | 5700                        | 180                             | 97                     | [8]        |
| Scotland               | 28000                       | 3000                            | 98                     | [9]        |
| Algeria                | 1607.8                      | 341.4                           | 79                     | [10]       |

  

| Country  | Concentration | References |
|----------|---------------|------------|
| France   | 6             | [1]        |
| Algeria  | 142.1         | [10]       |
| Kolumbia | 7–58          | [11]       |

## S1. Material characterization (β-CD-M)

### Elemental Analysis

Preparation of samples for elemental analysis consisted in drying at the temperature of 100 °C in a moisture analyzer until a constant mass was obtained. The powders were immediately transferred into packages, which were sealed and sent to the elemental analysis laboratory.

The basic element of the material most likely contains three β-CD molecules. One has as many as six substituted hydroxyl groups, while the other two only have five. Fourteen hydroxyl groups were involved in the usual polyurethane bonds while two others form the allophanate system, which explains the high nitrogen content.

**Anal. Calcd.** (β-CD-M): C<sub>262</sub>H<sub>434</sub>N<sub>36</sub>O<sub>141</sub>: 7.95 (N), 49.60 (C), 6.89 (H), 35.56 (O).

**Anal. found.** (β-CD-M): 7.93 (N), 49.26 (C), 6.84 (H), 35.05 (O).

**Table S2.** Selected FTIR bands recorded during the analysis of raw material and product samples (KBr pellet).

| Compound      | Wavenumber (cm <sup>-1</sup> )               | Vibration Allocation                      |
|---------------|----------------------------------------------|-------------------------------------------|
| $\beta$ -CD   | 3385.45 (strong, broad)                      | OH stretching intermolecular bonded       |
|               | 2929.23 (medium, broad)                      | OH stretching intermolecular bonded       |
|               | 1636.38 (medium, broad)                      | C=O stretching hemiacetal                 |
|               | 1412.06 (medium, broad)                      | OH-bending                                |
|               | 1157.02 – 1029.20 (strong, broad)            | OH stretching                             |
|               | 1157.02 (sharp overtone)                     | OH stretching secondary alcohol           |
|               | 1078.86 (Sharp overtone)                     | OH stretching primary alcohol             |
| HDI           | 2939.74 (medium, broad)                      | C-H stretching methylene group            |
|               | 2861.62 (medium, sharp)                      | C-H stretching methylene group            |
|               | 2274.84 (strong, broad)                      | N=C=O stretching isocyanate               |
|               | 1463.47 (sharp)                              | CH bending methylene group                |
|               | 1355.46 (sharp)                              | CH bending methylene group                |
|               | 863.50 (sharp)                               | CH <sub>2</sub> rocking methylene group   |
|               | 792.88 (sharp)                               | CH <sub>2</sub> rocking methylene group   |
| $\beta$ -CD-M | 3420.01 (strong, broad)                      | OH stretching intermolecular bonded       |
|               | 2934.19 (medium, broad)                      | C-H stretching alkane                     |
|               | 2860.08 (medium, sharp)                      | C-H stretching alkane                     |
|               | 1715.86 (strong, split)                      | C=O stretching urethane and allophanate   |
|               | 1653.07, 1646.76 and 1636.22 (strong, split) | C=O stretching urethane and allophanate   |
|               | 1557.86, 1540.70, 1533.92 (strong, split)    | C=O stretching hemiacetal                 |
|               | 1457.28 (split)                              | C-N-H stretching urethane and allophanate |
|               | 1418.01 (split)                              | CH bending methylene group                |
|               | 1260.48 (sharp)                              | CH bending methylene group                |
|               | 1151.52 – 1033.29 (strong, broad)            | OH stretching ester group C-(O)-O-C       |
|               | 1151.52 (sharp)                              | OH stretching                             |
|               | 773.93 (sharp)                               | OH stretching secondary alcohol           |
|               |                                              | CH <sub>2</sub> rocking methylene group   |

**Table S3.** List of selected FTIR bands recorded during the analysis of regenerated  $\beta$ -CD-M samples (KBr pellet).

| Compound                            | Wavenumber (cm <sup>-1</sup> )  | Vibration allocation                      |
|-------------------------------------|---------------------------------|-------------------------------------------|
| $\beta$ -CD-M<br>first regeneration | 34219.59 (strong, broad)        | OH stretching intermolecular bonded       |
|                                     | 2935.06 (medium, broad)         | C-H stretching alkane                     |
|                                     | 2860.51 (medium, sharp)         | C-H stretching alkane                     |
|                                     | 1705.72 (strong, split)         | C=O stretching urethane allophanate       |
|                                     | 1653.07 and 1646.76             | C=O stretching urethane and allophanate   |
|                                     | 1636.22                         | C=O stretching hemiacetal                 |
|                                     | (strong, split)                 |                                           |
|                                     | 1540.74 (strong, split)         | C-N-H stretching urethane and allophanate |
|                                     | 1457.53 (split)                 | CH bending methylene group                |
|                                     | 1417.47 (split)                 | CH bending methylene group                |
|                                     | 1261.27 (sharp)                 | OH stretching ester group C-(O)-O-C       |
| $\beta$ -CD-M<br>fifth regeneration | 1151.68–1031.97 (strong, broad) | OH stretching                             |
|                                     | 1151.68 (sharp)                 | OH stretching secondary alcohol           |
|                                     | 774.33 (sharp)                  | CH <sub>2</sub> rocking methylene group   |
|                                     | 3415.26 (strong, broad)         | OH stretching intermolecular bonded       |
|                                     | 2933.77 (medium, broad)         | C-H stretching alkane                     |
|                                     | 2859.74 (medium, sharp)         | C-H stretching alkane                     |
|                                     | 1709.26 (strong, split)         | C=O stretching urethane and allophanate   |
|                                     | 1651.57 (strong, split)         | C=O stretching urethane and allophanate   |
|                                     | 1546.18 (strong, split)         | C-N-H stretching urethane and allophanate |
|                                     | 1461.12 (split)                 | CH bending methylene group                |
|                                     | 1412.01 (split)                 | CH bending methylene group                |
|                                     | 1261.20 (sharp)                 | OH stretching ester group C-(O)-O-C       |
| $\beta$ -CD-M<br>fifth regeneration | 1150.72–1033.37 (strong, broad) | OH stretching                             |
|                                     | 1150.72 (sharp)                 | OH stretching secondary alcohol           |
|                                     | 773.62 (sharp)                  | CH <sub>2</sub> rocking methylene group   |

Buffer (0.05 M trisaminomethane hydrochloride—Tris HCl; pH = 7) was used to prepare standard  $\beta$ -CD solutions (0.1–0.5 mmol L<sup>-1</sup>). Phenolphthalein working solution (0.6 mmol L<sup>-1</sup>) was prepared by dissolving 1.5 ml of phenolphthalein stock solution (4 mmol L<sup>-1</sup> in ethanol) in carbonate buffer at pH 10.5 just before the measurements. Test samples were prepared by mixing 1 mL of  $\beta$ -CD solution with 4 mL of phenolphthalein working solution. Separately, the 10 mg (20 mg) of material was suspended in a mixture of 1 ml of Tris HCl buffer and 4 ml of working phenolphthalein solution. All samples were shaken for one hour prior to absorbance measurements. The adsorbent was filtered off through Whatman Grade 540 filter paper. The absorbance of the standard solution and the samples was measured at 550 nm with a UV-VIS spectrophotometer (Hach Lange UV-vis DR 6000). A mixture of 1 ml of Tris HCl buffer and 4 ml of working phenolphthalein solution was used as a control solution. A calibration curve in form of absorbance as a function of  $\beta$ -CD weight was plotted for the standard solutions and an available for complexation  $\beta$ -CD was determined. Measurements were made in triplicate [12–14].

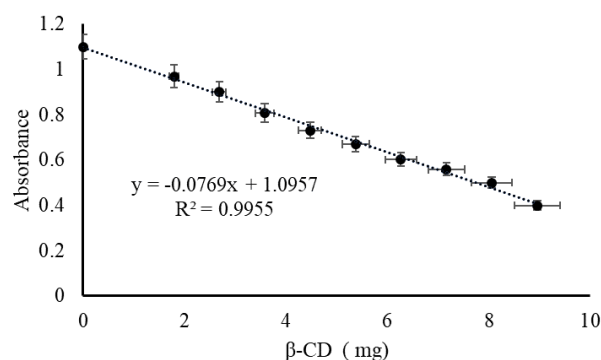

**Figure S1.** Spontaneous decrease in absorbance of phenolphthalein solution ( $\lambda = 550$  nm).

**Table S4.** Changes in the value of phenolphthalein absorbance (A) in contact with 10 mg of  $\beta$ -CD-M.

| $\beta$ -CD-M (mg) | A ( $\lambda = 550$ nm) | A Average |
|--------------------|-------------------------|-----------|
| 10                 | 0.673                   | 0.672     |
| 10                 | 0.668                   |           |
| 10                 | 0.675                   |           |

The amount of CD in the samples determined on the basis of the standard curve is 5.51 mg.

*Specific Surface Area and Pore Size Distribution of Examined Adsorbent*

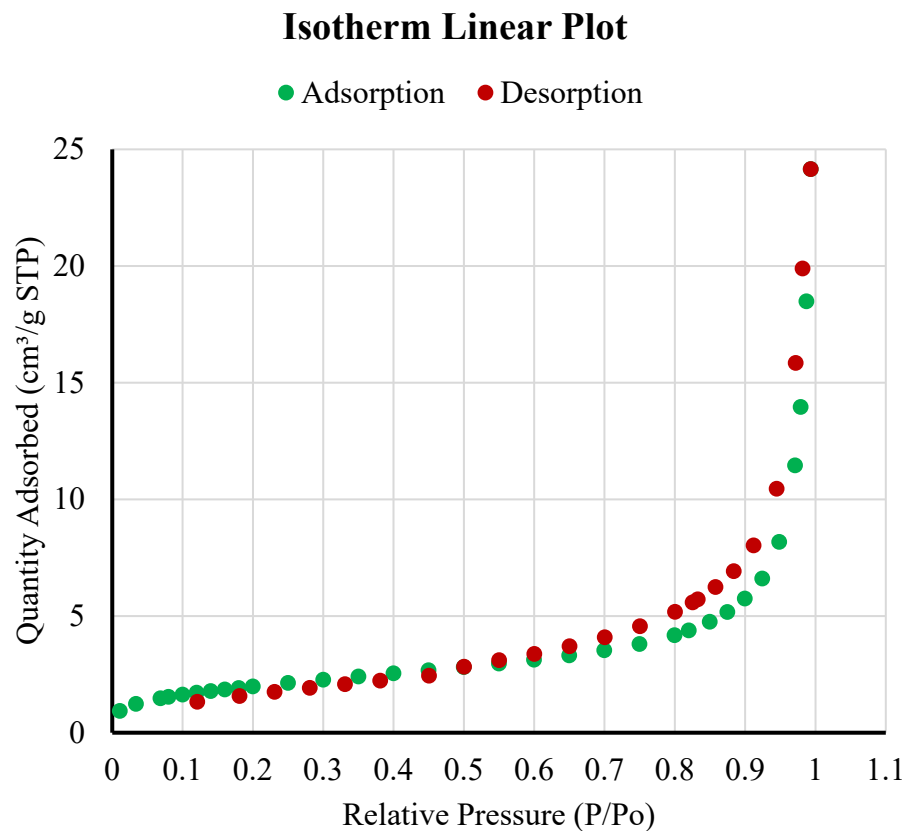

**Figure S2.** N<sub>2</sub> adsorption–desorption isotherms for  $\beta$ -CD–M at 77 K.

**Table S5.** BET Surface Area Report for  $\beta$ -CD–M.

| Parameter                      | Value                                                     |
|--------------------------------|-----------------------------------------------------------|
| BET Surface Area               | $7.3092 \pm 0.0251 \text{ m}^2/\text{g}$                  |
| Slope                          | $0.585891 \pm 0.002021 \text{ g}/\text{cm}^3 \text{ STP}$ |
| Y-Intercept                    | $0.009684 \pm 0.000313 \text{ g}/\text{cm}^3 \text{ STP}$ |
| C                              | 61.499882                                                 |
| Qm                             | $1.6790 \text{ cm}^3/\text{g STP}$                        |
| Correlation Coefficient        | 0.9999583                                                 |
| Molecular Cross-Sectional Area | $0.1620 \text{ nm}^2$                                     |

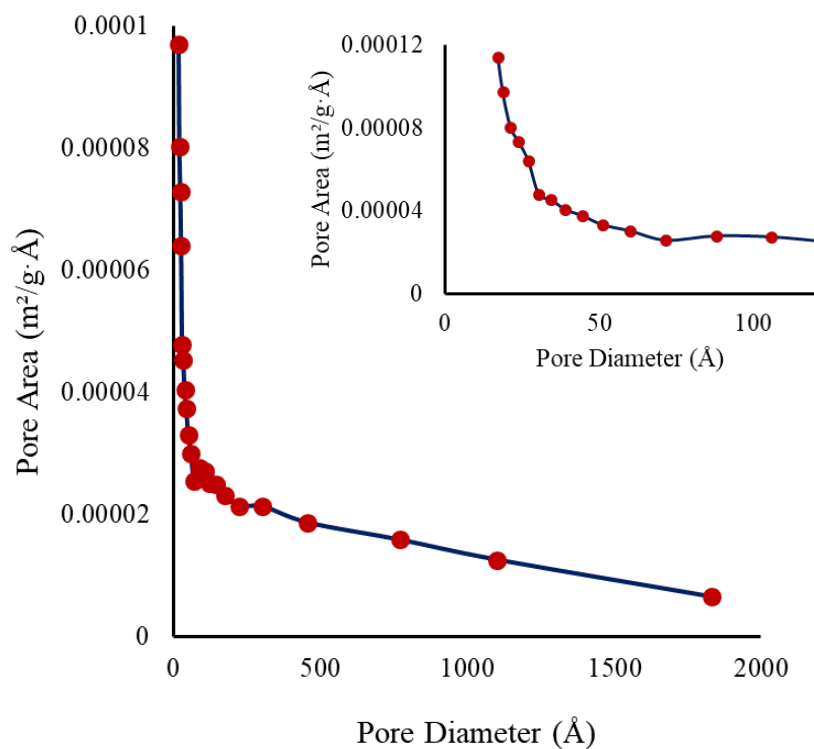

**Figure S3.** Barrett-Joyner-Halenda (BJH) pore size distribution from N<sub>2</sub> adsorption isotherm expressed as pore volume for  $\beta$ -CD-M.

**Table S6.** Porous property of  $\beta$ -CD-M.

| Pore Diameter Range (Å) | Average Diameter (Å) | Incremental Pore Volume (cm <sup>3</sup> /g) | Cumulative Pore Volume (cm <sup>3</sup> /g) | Incremental Pore Area (m <sup>2</sup> /g) | Cumulative Pore Area (m <sup>2</sup> /g) |
|-------------------------|----------------------|----------------------------------------------|---------------------------------------------|-------------------------------------------|------------------------------------------|
| 2947.2–1534.1           | 1830.774             | 0.009238                                     | 0.009238                                    | 0.201839                                  | 0.201839                                 |
| 1534.1–942.5            | 1102.189             | 0.007448                                     | 0.016686                                    | 0.270286                                  | 0.472125                                 |
| 942.5–682.2             | 770.697              | 0.004129                                     | 0.020815                                    | 0.214321                                  | 0.686446                                 |
| 682.2–387.8             | 457.6209             | 0.0055                                       | 0.026315                                    | 0.480775                                  | 1.167221                                 |
| 387.8–266.4             | 304.4597             | 0.002589                                     | 0.028905                                    | 0.340187                                  | 1.507408                                 |
| 266.4–201.4             | 224.6045             | 0.001389                                     | 0.030294                                    | 0.247348                                  | 1.754757                                 |
| 201.4–161.8             | 177.0667             | 0.000919                                     | 0.031213                                    | 0.20767                                   | 1.962427                                 |
| 161.8–135.0             | 145.8403             | 0.000666                                     | 0.031879                                    | 0.182658                                  | 2.145085                                 |
| 135.0–112.5             | 121.5831             | 0.000565                                     | 0.032444                                    | 0.185824                                  | 2.330908                                 |
| 112.5–100.9             | 106.0269             | 0.000315                                     | 0.032759                                    | 0.118879                                  | 2.449788                                 |
| 100.9–80.2              | 88.0325              | 0.000572                                     | 0.033331                                    | 0.259916                                  | 2.709704                                 |
| 80.2–66.2               | 71.72943             | 0.000359                                     | 0.03369                                     | 0.200382                                  | 2.910086                                 |
| 66.2–56.0               | 60.12403             | 0.000307                                     | 0.033997                                    | 0.204264                                  | 3.11435                                  |
| 56.0–48.1               | 51.39819             | 0.000258                                     | 0.034255                                    | 0.200487                                  | 3.314837                                 |
| 48.1–41.9               | 44.56554             | 0.000232                                     | 0.034487                                    | 0.208325                                  | 3.523163                                 |
| 41.9–36.9               | 39.0399              | 0.000206                                     | 0.034692                                    | 0.210607                                  | 3.733769                                 |
| 36.9–32.6               | 34.45013             | 0.000193                                     | 0.034885                                    | 0.22353                                   | 3.9573                                   |
| 32.6–29.0               | 30.5469              | 0.000175                                     | 0.03506                                     | 0.228849                                  | 4.186148                                 |
| 29.0–25.8               | 27.16056             | 0.000204                                     | 0.035264                                    | 0.300578                                  | 4.486727                                 |
| 25.8–22.9               | 24.15764             | 0.000208                                     | 0.035472                                    | 0.345152                                  | 4.831878                                 |
| 22.9–20.3               | 21.43404             | 0.00021                                      | 0.035682                                    | 0.391274                                  | 5.223152                                 |
| 20.3–17.9               | 18.91799             | 0.000236                                     | 0.035918                                    | 0.498134                                  | 5.721286                                 |
| 17.9–16.9               | 17.37733             | 0.000107                                     | 0.036025                                    | 0.246704                                  | 5.96799                                  |

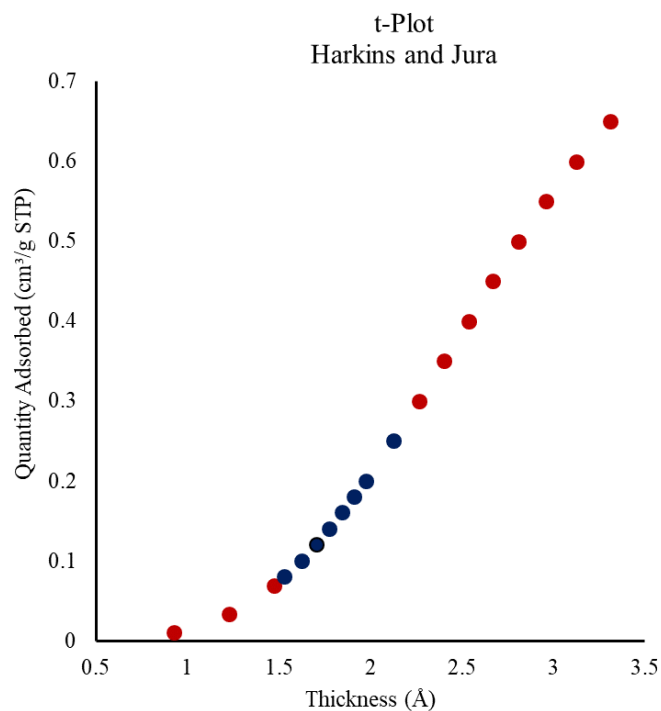

**Figure S4.** Harkins and Jura t-Plot for  $\beta$ -CD-M. Blue dots correspond to estimated isotherm, red represent not fitted points.

**Table S7.** t-Plot Report for  $\beta$ -CD-M.

| Parameter                       | Value                                            |
|---------------------------------|--------------------------------------------------|
| Micropore Volume:               | -0.000364 cm <sup>3</sup> /g                     |
| Micropore Area:                 | *                                                |
| External Surface Area:          | 7.8226 m <sup>2</sup> /g                         |
| Slope:                          | 0.505726 $\pm$ 0.008214 cm <sup>3</sup> /g·Å STP |
| Y-Intercept:                    | -0.235420 $\pm$ 0.033394 cm <sup>3</sup> /g STP  |
| Correlation Coefficient:        | 0.999210                                         |
| Surface Area Correction Factor: | 1.000                                            |
| Density Conversion Factor:      | 0.0015468                                        |
| Total Surface Area (BET):       | 7.3092 m <sup>2</sup> /g                         |
| Thickness Range:                | 3.5000 Å to 5.0000 Å                             |
| Thickness Equation:             | Harkins and Jura                                 |

\*The micropore area is not reported because the micropore volume is negative.

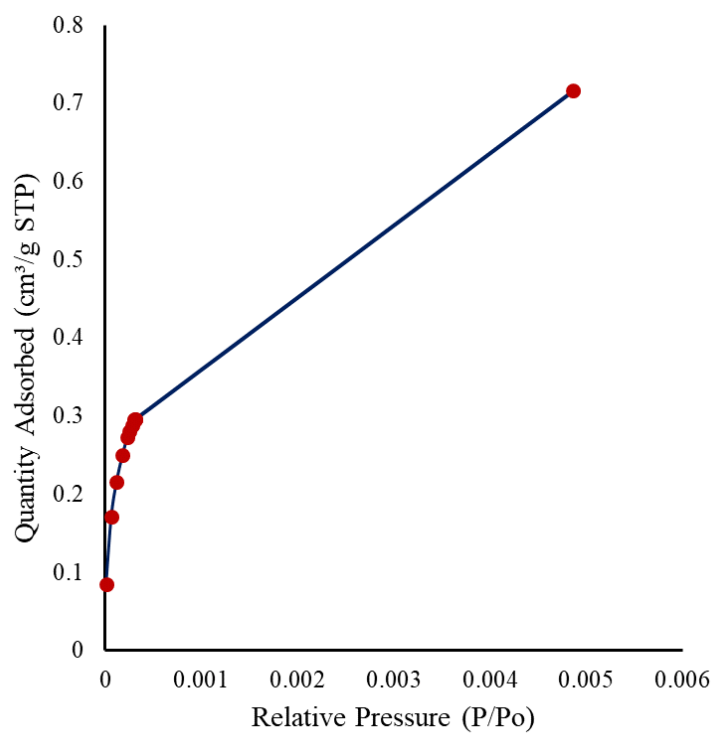

**Figure S5.** Horvath-Kawazoe Isotherm Linear Plot of  $\beta$ -CD-M.

**Table S8.** Summary rapport of  $\beta$ -CD-M microporous.

| Parameter                                             | Value                       |
|-------------------------------------------------------|-----------------------------|
| Volume in Pores<8.01 Å                                | 0.00018 cm <sup>3</sup> /g  |
| Total Volume in Pores ≤ 19.43 Å                       | 0.00118 cm <sup>3</sup> /g  |
| Area in Pores>19.43 Å                                 | 0.000 m <sup>2</sup> /g     |
| Total Area in Pores ≥ 8.01 Å                          | 1.490 m <sup>2</sup> /g     |
| Maximum pore volume at P/P <sub>0</sub> = 0.004867606 | 0.001107 cm <sup>3</sup> /g |
| Median pore width                                     | 8.415 Å                     |

## Thermogravimetric Analysis of $\beta$ -CD-M

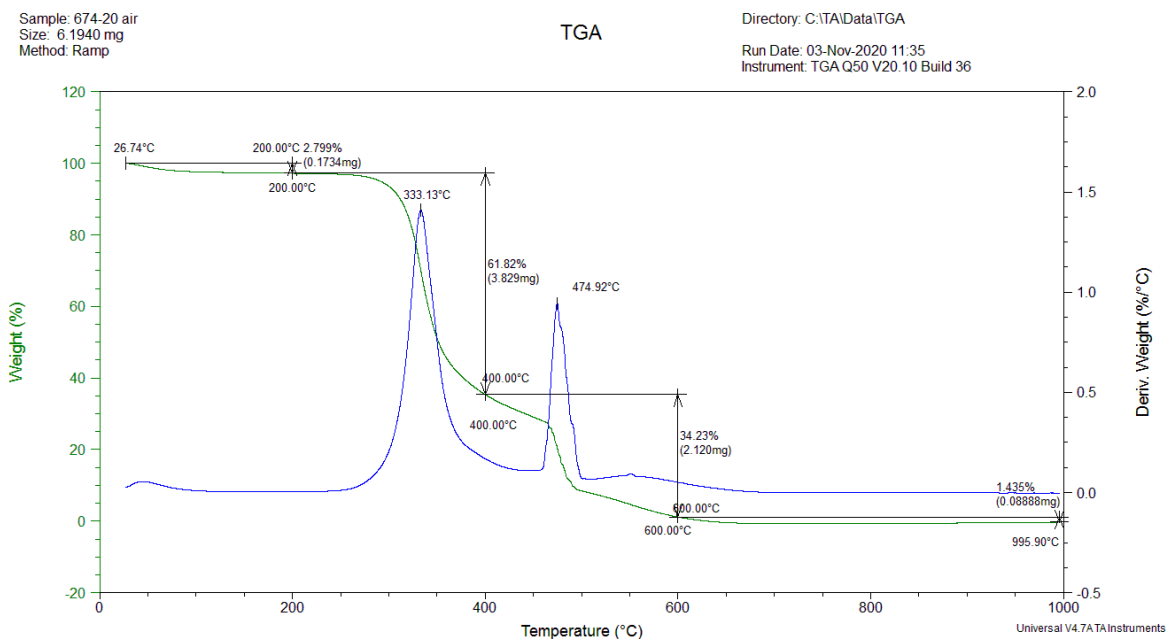

Figure S6. Thermogravimetric analysis of  $\beta$ -CD-M in the air atmosphere.

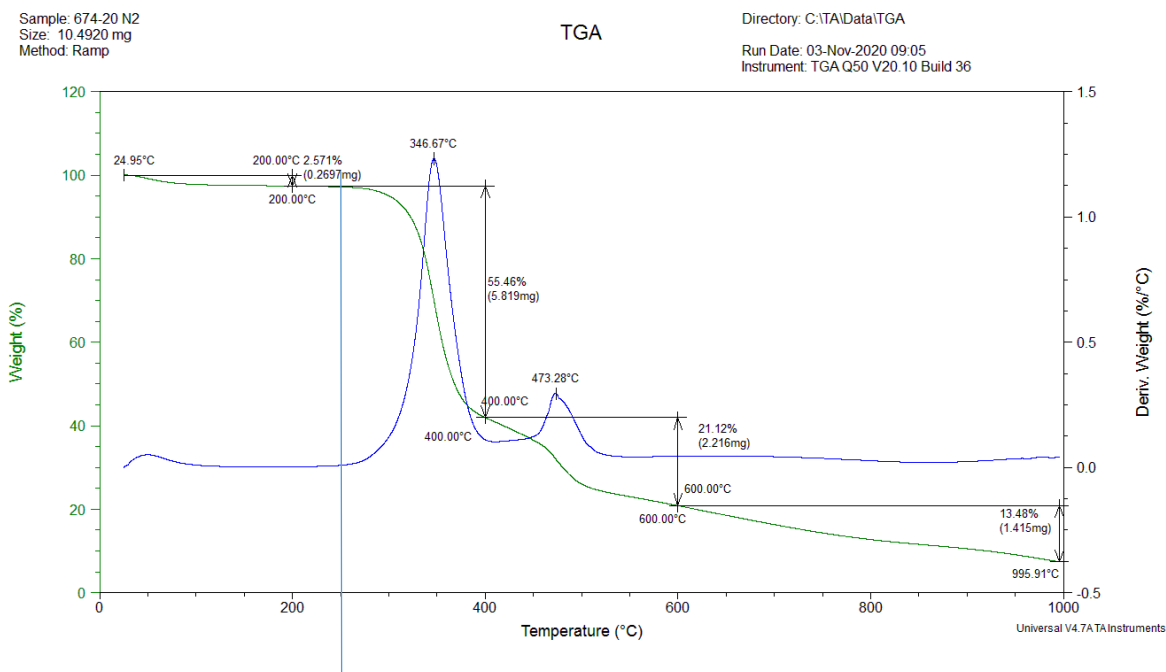

Figure S7. Thermogravimetric analysis of  $\beta$ -CD-M in nitrogen atmosphere.

## References

1. Togola, A.; Budzinski, H. Multi-residue analysis of pharmaceutical compounds in aqueous samples. *J. Chromatogr. A* **2008**, *1177*, 150–158, doi:10.1016/j.chroma.2007.10.105.
2. Stasinakis, A.S.; Mermigka, S.; Samaras, V.G.; Farmaki, E.; Thomaidis, N. Occurrence of endocrine disruptors and selected pharmaceuticals in Aisonas River (Greece) and environmental risk assessment using hazard indexes. *Environ. Sci. Pollut. Res.* **2012**, *19*, 1574–1583, doi:10.1007/s11356-011-0661-7.
3. Gibson, R.; Durán-Álvarez, J.C.; Estrada, K.L.; Chávez, A.; Cisneros, B.J. Accumulation and leaching potential of some pharmaceuticals and potential endocrine disruptors in soils irrigated with wastewater in the Tula Valley, Mexico. *Chemosphere* **2010**, *81*, 1437–1445, doi:10.1016/j.chemosphere.2010.09.006.



4. Paíga, P.; Santos, L.; Amorim, C.G.; Araujo, A.; Montenegro, M.; Pena, A.; Delerue-Matos, C. Pilot monitoring study of ibuprofen in surface waters of north of Portugal. *Environ. Sci. Pollut. Res.* **2012**, *20*, 2410–2420, doi:10.1007/s11356-012-1128-1.
5. Zhang, S.; Zhang, Q.; Darisaw, S.; Ehie, O.; Wang, G. Simultaneous quantification of polycyclic aromatic hydrocarbons (PAHs), polychlorinated biphenyls (PCBs), and pharmaceuticals and personal care products (PPCPs) in Mississippi river water, in New Orleans, Louisiana, USA. *Chemosphere* **2007**, *66*, 1057–1069, doi:10.1016/j.chemosphere.2006.06.067.
6. Czerwiński, J.; Kłonica, A.; Ozonek, J.; Środowisku, W. Wodnym I Metody, Czasopismo Inżynierii Łądowej, Środowiska i Architektury. **2015**, *62*, 27–42.
7. Tauxe-Wuersch, A.; De Alencastro, L.; Grandjean, D.; Tarradellas, J. Occurrence of several acidic drugs in sewage treatment plants in Switzerland and risk assessment. *Water Res.* **2005**, *39*, 1761–1772, doi:10.1016/j.watres.2005.03.003.
8. Quintana, J.B.; Weiss, S.; Reemtsma, T. Pathways and metabolites of microbial degradation of selected acidic pharmaceutical and their occurrence in municipal wastewater treated by a membrane bioreactor. *Water Res.* **2005**, *39*, 2654–2664, doi:10.1016/j.watres.2005.04.068.
9. Roberts, P.H.; Thomas, K.V. The occurrence of selected pharmaceuticals in wastewater effluent and surface waters of the lower Tyne catchment. *Sci. Total. Environ.* **2006**, *356*, 143–153, doi:10.1016/j.scitotenv.2005.04.031.
10. Kermia, A.E.B.; Fouial-Djebbar, D.; Trari, M. Occurrence, fate and removal efficiencies of pharmaceuticals in wastewater treatment plants (WWTPs) discharging in the coastal environment of Algiers. *Comptes Rendus Chim.* **2016**, *19*, 963–970, doi:10.1016/j.crci.2016.05.005.
11. Aristizabal-Ciro, C.; Botero-Coy, A.M.; López, F.J.; Peñuela, G.A. Monitoring pharmaceuticals and personal care products in reservoir water used for drinking water supply. *Environ. Sci. Pollut. Res.* **2017**, *24*, 7335–7347, doi:10.1007/s11356-016-8253-1.
12. Goel, A.; Nene, S.N. Modifications in the Phenolphthalein Method for Spectrophotometric Estimation of Beta Cyclodextrin. *Starch-Stärke* **1995**, *47*, 399–400, doi:10.1002/star.19950471006.
13. Higuti, I.H.; Da Silva, P.A.; Papp, J.; Okiyama, V.M.D.E.; De Andrade, E.A.; Marcondes, A.D.A.; Nascimento, A.J.D. Colorimetric determination of alpha and beta-cyclodextrins and studies on optimization of CGTase production from *B. firmus* using factorial designs. *Braz. Arch. Biol. Technol.* **2004**, *47*, 837–841, doi:10.1590/s1516-89132004000600001.
14. de Souza, Ícaro F.; Petri, D.F.  $\beta$ -Cyclodextrin hydroxypropyl methylcellulose hydrogels for bisphenol A adsorption. *J. Mol. Liq.* **2018**, *266*, 640–648, doi:10.1016/j.molliq.2018.06.117.
